# Supplementary material for: SARS-CoV-2 and the role of vertical transmission from infected pregnant women to their fetuses: systematic review
Source: medRxiv preprint, doi:10.1101/2021.06.30.21259750, version 1 (2021-07-05)
Supplement: Literature search strategy [file 259750_file06.pdf]

**Living rapid review on the modes of transmission of SARs-CoV-2 (reference WHO registration N°2020/1077093).**

---

**Search Strategy (last updated 30 Jan 2021)**

We searched four main databases:

- **WHO Covid-19 Database**  
(<https://search.bvsalud.org/global-literature-on-novel-coronavirus-2019-ncov/>)  
The global literature cited in the WHO COVID-19 database is updated daily (Monday through Friday) from searches of bibliographic databases, hand searching, and the addition of other expert-referred scientific articles.
- **LitCovid** (<https://www.ncbi.nlm.nih.gov/research/coronavirus/>)  
A curated literature hub for tracking up-to-date scientific information about the 2019 novel Coronavirus. It is a comprehensive resource on the subject, providing a central access to relevant articles in PubMed.
- **medRxiv** (<https://www.medrxiv.org/>)  
A free online archive and distribution server for complete but unpublished manuscripts (preprints) in the medical, clinical, and related health sciences.
- **Google Scholar** (<https://scholar.google.com/>)  
Provides a broad search for scholarly literature across many disciplines and sources: articles, theses, books, abstracts and court opinions, from academic publishers, professional societies, online repositories, universities and other web sites.

Searches were initially undertaken monthly but from September, due to the volume of new studies, they moved to searching every fortnight. For databases which do not support date granularity, date of publication was approximated. All retrieved articles are entered into a google sheet that is then used to filter and check articles for inclusion.

WHO Covid-19 Database, LitCovid are specific Covid-19 databases so there was no requirement to add a search string to identify Covid-19 articles. For medRxiv and Google Scholar we used the terms *coronavirus OR covid-19 OR SARS-CoV-2*.

For the respective topics we used the following terms:

Airborne: *aerosol OR airborne OR airbourne OR inhalation OR air OR droplet*

Orofecal: *orofecal OR oro-fecal OR faecal OR fecal OR stool OR faeces OR feces OR rectal OR rectum OR anal OR anus OR toilet*

Fomite: *fomite OR surfaces*

These terms were also combined with the term *transmission*.

Additional techniques were used to identify relevant topics:

- For articles that looked particularly relevant, citation tracking was undertaken.
- For included systematic reviews, the lists of included and excluded articles were examined for inclusion.

The search strategy is subject to continual review and updated and is maintained by Brassey J.
